# Supplementary material for: Ecological and Construct Validity of a New Technical Level Cuban Dance Field Test
Source: MDPI journal article supplement (doi:10.3390/ijerph182413287), 2021-12-16
Supplement: s1 [file s1]

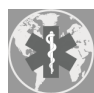

## Supplementary Materials

**Table S1.** ROC curves: Sensitivity (95% CI), specificity (95% CI), positive predictive value (PPV), negative predictive value (NPV), and accuracy on the basis of the level of difficulty (beginner vs. intermediate).

| Threshold | Sensitivity | 95% CI Sensitivity | Specificity | 95% CI Specificity | PPV   | NPV   | Accuracy |
|-----------|-------------|--------------------|-------------|--------------------|-------|-------|----------|
| - Inf.    | 1.000       | 1.000–1.000        | 0.000       | 0.000–0.000        | 0.500 | -     | 0.500    |
| 27.5      | 1.000       | 1.000–1.000        | 0.033       | 0.000–0.100        | 0.508 | 1.000 | 0.517    |
| 29        | 1.000       | 1.000–1.000        | 0.100       | 0.000–0.233        | 0.526 | 1.000 | 0.550    |
| 33        | 1.000       | 1.000–1.000        | 0.133       | 0.033–0.267        | 0.536 | 1.000 | 0.567    |
| 37        | 1.000       | 1.000–1.000        | 0.167       | 0.033–0.300        | 0.545 | 1.000 | 0.583    |
| 39        | 1.000       | 1.000–1.000        | 0.300       | 0.133–0.467        | 0.588 | 1.000 | 0.650    |
| 49.5      | 1.000       | 1.000–1.000        | 0.333       | 0.167–0.500        | 0.600 | 1.000 | 0.667    |
| 77        | 1.000       | 1.000–1.000        | 0.367       | 0.200–0.533        | 0.612 | 1.000 | 0.683    |
| 96        | 1.000       | 1.000–1.000        | 0.400       | 0.233–0.567        | 0.625 | 1.000 | 0.700    |
| 98.5      | 1.000       | 1.000–1.000        | 0.467       | 0.300–0.634        | 0.652 | 1.000 | 0.733    |
| 100.5     | 1.000       | 1.000–1.000        | 0.633       | 0.467–0.800        | 0.732 | 1.000 | 0.817    |
| 140.5*    | 1.000       | 1.000–1.000        | 0.667       | 0.500–0.833        | 0.750 | 1.000 | 0.833    |
| 189       | 0.967       | 0.900–1.000        | 0.667       | 0.500–0.833        | 0.744 | 0.952 | 0.817    |
| 199       | 0.933       | 0.833–1.000        | 0.667       | 0.500–0.833        | 0.737 | 0.909 | 0.800    |
| 200.5     | 0.800       | 0.666–0.933        | 0.667       | 0.500–0.833        | 0.706 | 0.769 | 0.733    |
| 201.5     | 0.733       | 0.567–0.867        | 0.667       | 0.500–0.833        | 0.688 | 0.714 | 0.700    |
| 202.5     | 0.700       | 0.533–0.867        | 0.667       | 0.500–0.833        | 0.677 | 0.690 | 0.683    |
| 250       | 0.667       | 0.500–0.833        | 0.667       | 0.500–0.833        | 0.667 | 0.667 | 0.667    |
| 297.5     | 0.667       | 0.500–0.833        | 0.700       | 0.533–0.833        | 0.690 | 0.677 | 0.683    |
| 299       | 0.667       | 0.500–0.833        | 0.733       | 0.567–0.867        | 0.714 | 0.688 | 0.700    |
| 300.5     | 0.533       | 0.333–0.700        | 0.933       | 0.833–1.000        | 0.889 | 0.667 | 0.733    |
| 301.5     | 0.467       | 0.267–0.633        | 1.000       | 1.000–1.000        | 1.000 | 0.652 | 0.733    |
| 302.5     | 0.300       | 0.133–0.467        | 1.000       | 1.000–1.000        | 1.000 | 0.588 | 0.650    |
| 303.5     | 0.200       | 0.067–0.367        | 1.000       | 1.000–1.000        | 1.000 | 0.556 | 0.600    |
| 304.5     | 0.167       | 0.033–0.333        | 1.000       | 1.000–1.000        | 1.000 | 0.545 | 0.583    |
| 305.5     | 0.100       | 0.00–0.233         | 1.000       | 1.000–1.000        | 1.000 | 0.526 | 0.550    |
| 307       | 0.033       | 0.000–0.100        | 1.000       | 1.000–1.000        | 1.000 | 0.508 | 0.517    |
| Inf.      | 0.000       | 0.000–0.000        | 1.000       | 1.000–1.000        | -     | 0.500 | 0.500    |

\* Highest average of sensitivity and specificity.  $AUC = 0.864$ ; 95% CI = 0.864–0.954.

**Table S2.** ROC curves: Sensitivity (95% CI), specificity (95% CI), positive predictive value (PPV), negative predictive value (NPV), and accuracy on the basis of the level of difficulty (intermediate vs. advanced).

| Threshold | Sensitivity | 95% CI Sensitivity | Specificity | 95% CI Specificity | PPV   | NPV   | Accuracy |
|-----------|-------------|--------------------|-------------|--------------------|-------|-------|----------|
| -Inf      | 1.000       | 1.000–1.000        | 0.000       | 0.000–0.000        | 0.500 | -     | 0.500    |
| 189       | 1.000       | 1.000–1.000        | 0.033       | 0.000–0.100        | 0.508 | 1.000 | 0.517    |
| 199       | 1.000       | 1.000–1.000        | 0.067       | 0.000–0.167        | 0.517 | 1.000 | 0.533    |
| 200.5     | 1.000       | 1.000–1.000        | 0.200       | 0.067–0.333        | 0.556 | 1.000 | 0.600    |
| 201.5     | 1.000       | 1.000–1.000        | 0.267       | 0.133–0.433        | 0.577 | 1.000 | 0.633    |
| 202.5     | 1.000       | 1.000–1.000        | 0.300       | 0.133–0.467        | 0.588 | 1.000 | 0.650    |
| 251.5     | 1.000       | 1.000–1.000        | 0.333       | 0.167–0.500        | 0.600 | 1.000 | 0.667    |
| 300.5     | 1.000       | 1.000–1.000        | 0.467       | 0.300–0.667        | 0.652 | 1.000 | 0.733    |
| 301.5     | 0.933       | 0.833–1.000        | 0.533       | 0.367–0.733        | 0.667 | 0.889 | 0.733    |
| 302.5     | 0.700       | 0.533–0.867        | 0.700       | 0.533–0.867        | 0.700 | 0.700 | 0.700    |
| 303.5     | 0.700       | 0.533–0.867        | 0.800       | 0.667–0.933        | 0.778 | 0.727 | 0.750    |
| 304.5     | 0.700       | 0.533–0.867        | 0.833       | 0.700–0.967        | 0.808 | 0.735 | 0.767    |
| 305.5*    | 0.700       | 0.533–0.867        | 0.900       | 0.800–1.000        | 0.875 | 0.750 | 0.800    |
| 306.5     | 0.633       | 0.467–0.800        | 0.967       | 0.900–1.000        | 0.950 | 0.725 | 0.800    |
| 307.5     | 0.367       | 0.200–0.533        | 0.967       | 0.900–1.000        | 0.917 | 0.604 | 0.667    |
| 308.5     | 0.367       | 0.200–0.533        | 1.000       | 1.000–1.000        | 1.000 | 0.612 | 0.683    |
| 314.5     | 0.333       | 0.167–0.500        | 1.000       | 1.000–1.000        | 1.000 | 0.600 | 0.667    |
| Inf       | 0.000       | 0.000–0.000        | 1.000       | 1.000–1.000        | -     | 0.500 | 0.500    |

\* Highest average of sensitivity and specificity.  $AUC = 0.864$ ; 95% CI = 0.864–0.952.

**Table S3.** ROC curve: Sensitivity (95% CI), specificity (95% CI), positive predictive value (PPV), negative predictive value (NPV), and accuracy on the basis of the level of difficulty (beginner vs. advanced).

| Threshold | Sensitivity | 95% CI Sensitivity | Specificity | 95% CI Specificity | PPV   | NPV   | Accuracy |
|-----------|-------------|--------------------|-------------|--------------------|-------|-------|----------|
| -Inf      | 1.000       | 1.000–1.000        | 0.000       | 0.000–0.000        | 0.500 | -     | 0.500    |
| 27.5      | 1.000       | 1.000–1.000        | 0.033       | 0.000–0.100        | 0.508 | 1.000 | 0.517    |
| 29        | 1.000       | 1.000–1.000        | 0.100       | 0.000–0.233        | 0.526 | 1.000 | 0.550    |
| 33        | 1.000       | 1.000–1.000        | 0.133       | 0.033–0.267        | 0.536 | 1.000 | 0.567    |
| 37        | 1.000       | 1.000–1.000        | 0.167       | 0.033–0.300        | 0.545 | 1.000 | 0.583    |
| 39        | 1.000       | 1.000–1.000        | 0.300       | 0.133–0.467        | 0.588 | 1.000 | 0.650    |
| 49.5      | 1.000       | 1.000–1.000        | 0.333       | 0.167–0.500        | 0.600 | 1.000 | 0.667    |
| 77        | 1.000       | 1.000–1.000        | 0.367       | 0.200–0.533        | 0.612 | 1.000 | 0.683    |
| 96        | 1.000       | 1.000–1.000        | 0.400       | 0.233–0.567        | 0.625 | 1.000 | 0.700    |
| 98.5      | 1.000       | 1.000–1.000        | 0.467       | 0.300–0.633        | 0.652 | 1.000 | 0.733    |
| 100.5     | 1.000       | 1.000–1.000        | 0.633       | 0.433–0.800        | 0.732 | 1.000 | 0.817    |
| 199       | 1.000       | 1.000–1.000        | 0.667       | 0.500–0.833        | 0.750 | 1.000 | 0.833    |
| 297.5     | 1.000       | 1.000–1.000        | 0.700       | 0.533–0.867        | 0.769 | 1.000 | 0.850    |
| 299       | 1.000       | 1.000–1.000        | 0.733       | 0.567–0.900        | 0.789 | 1.000 | 0.867    |
| 300.5*    | 1.000       | 1.000–1.000        | 0.933       | 0.833–1.000        | 0.938 | 1.000 | 0.967    |
| 301.5     | 0.933       | 0.833–1.000        | 1.000       | 1.000–1.000        | 1.000 | 0.938 | 0.967    |
| 304       | 0.700       | 0.533–0.867        | 1.000       | 1.000–1.000        | 1.000 | 0.769 | 0.850    |
| 306.5     | 0.633       | 0.467–0.800        | 1.000       | 1.000–1.000        | 1.000 | 0.732 | 0.817    |
| 308       | 0.367       | 0.200–0.533        | 1.000       | 1.000–1.000        | 1.000 | 0.612 | 0.683    |
| 314.5     | 0.333       | 0.167–0.500        | 1.000       | 1.000–1.000        | 1.000 | 0.600 | 0.667    |
| Inf       | 0.000       | 0.000–0.000        | 1.000       | 1.000–1.000        | -     | 0.500 | 0.500    |

\* Highest average of sensitivity and specificity.  $AUC = 0.998$ ; 95% CI = 0.993–1.000.
